# Supplementary material for: Dehydrochlorination of 1,2-dichloroethane over Ba-modified Al2O3 catalysts
Source: Royal Society of Chemistry journal article supplement (doi:10.1039/c6ra08855d), 2016-01-01
Supplement: c6ra08855d1.pdf [file c6ra08855d1.pdf]

# Dehydrochlorination of 1,2-dichloroethane over Ba modified $\text{Al}_2\text{O}_3$ catalysts

Shuxing Bai<sup>a</sup>, Qiguang Dai<sup>a\*</sup>, Xinxin Chu<sup>b</sup>, Xingyi Wang<sup>a\*</sup>

<sup>a</sup> Key Laboratory for Advanced Materials, Research Institute of Industrial Catalysis, East China University of Science and Technology, Shanghai 200237, PR China.

<sup>b</sup> Key Laboratory of Nuclear Radiation and Nuclear Energy Technology, Shanghai Institute of Applied Physics, Chinese Academy of Science, Shanghai 201800, PR China.

\*To whom correspondence should be addressed. Fax: (+86) + 21 64253372. E-mail:

daiqg@ecust.edu.cn (Q. Dai); wangxy@ecust.edu.cn (X. Wang)

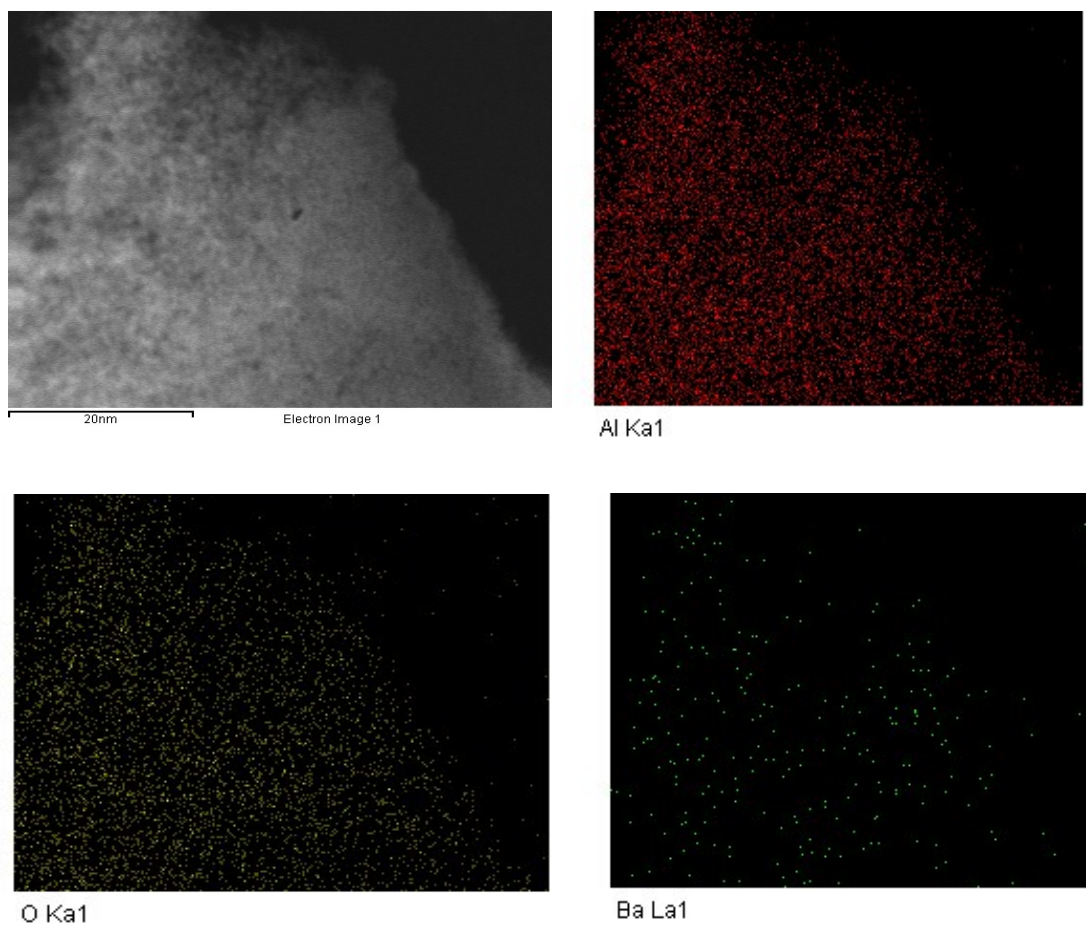

Fig. S1. The mapping of 4Ba/Al<sub>2</sub>O<sub>3</sub> catalyst.

| Element | Peak Area | Area Sigma | K factor | Abs Corn. | Weight % | Weight% Sigma | Atomic % |
|---------|-----------|------------|----------|-----------|----------|---------------|----------|
| O K     | 13009     | 200        | 0.758    | 1.000     | 42.48    | 0.45          | 56.86    |
| Al K    | 28458     | 283        | 0.437    | 1.000     | 53.58    | 0.45          | 42.53    |
| Ba L    | 1103      | 75         | 0.828    | 1.000     | 3.93     | 0.26          | 0.61     |
| Totals  |           |            |          |           | 100.00   |               |          |

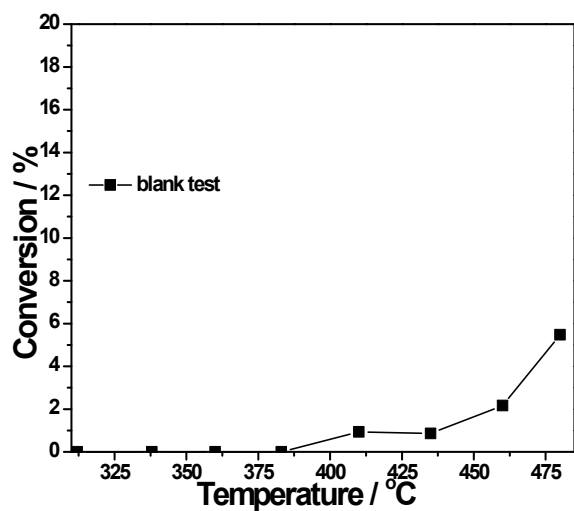

Conversion curves of 1, 2-DCE in blank test

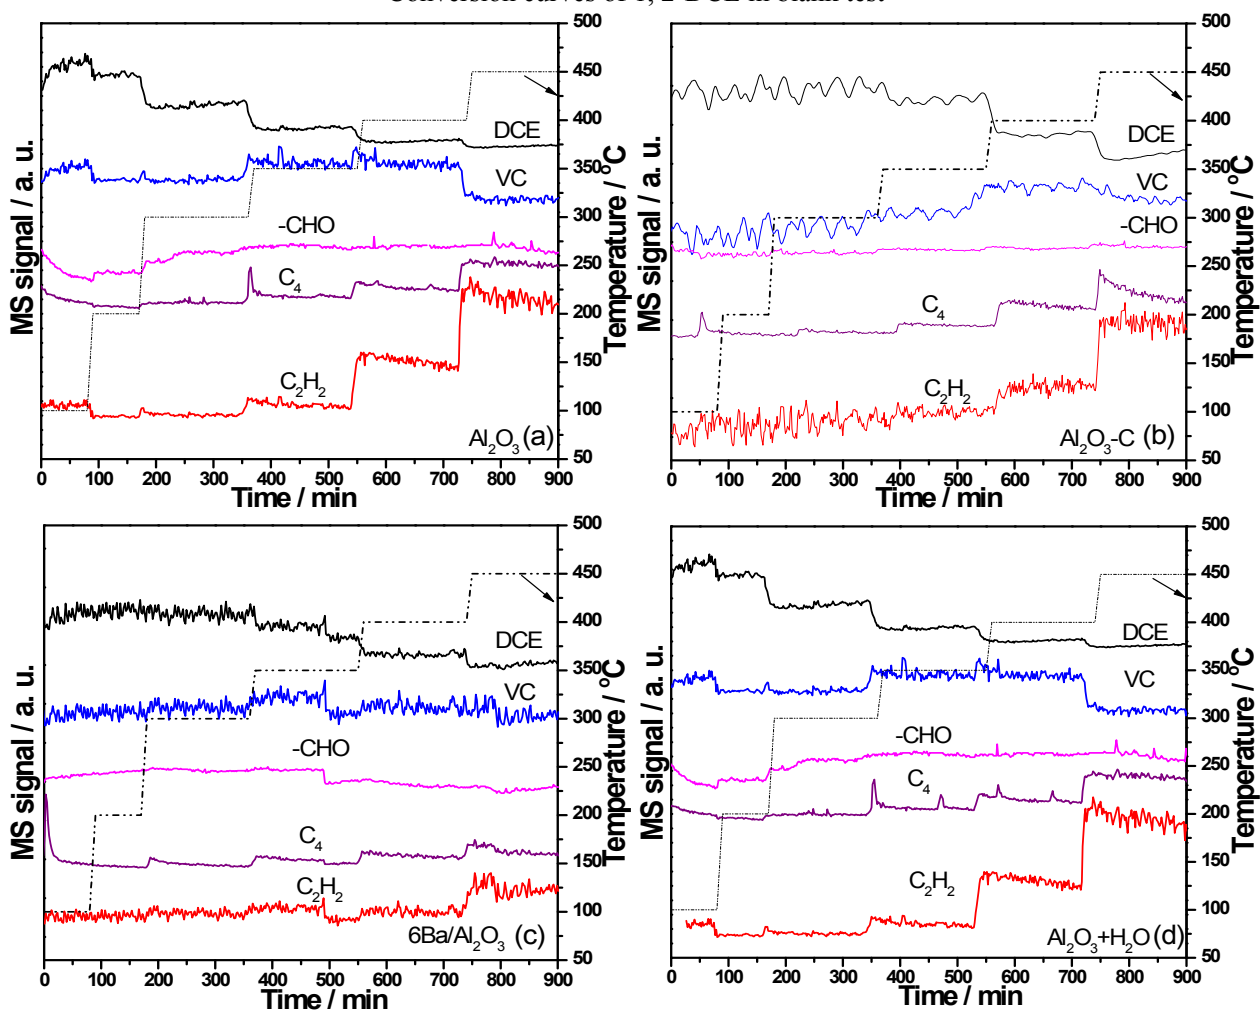

Fig. S2. TPSR of 1, 2-DC over  $\text{Al}_2\text{O}_3$  and  $\text{Ba}/\text{Al}_2\text{O}_3$ ; reaction gas: 1000 ppm 1,2-DCE and Ar balance;  $\text{SV}=30,000 \text{ mL g}^{-1} \text{ h}^{-1}$ .

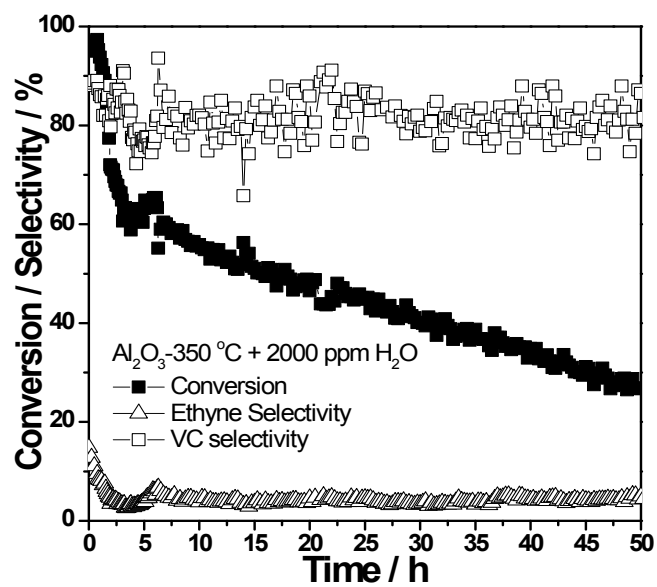

Fig. S3. The stability of Al<sub>2</sub>O<sub>3</sub> catalyst on wet feed stream at 350 °C; reaction gas: 1000 ppm 1,2-DCE, 2000 ppm H<sub>2</sub>O and Ar balance; SV=30,000 mL g<sup>-1</sup> h<sup>-1</sup>.

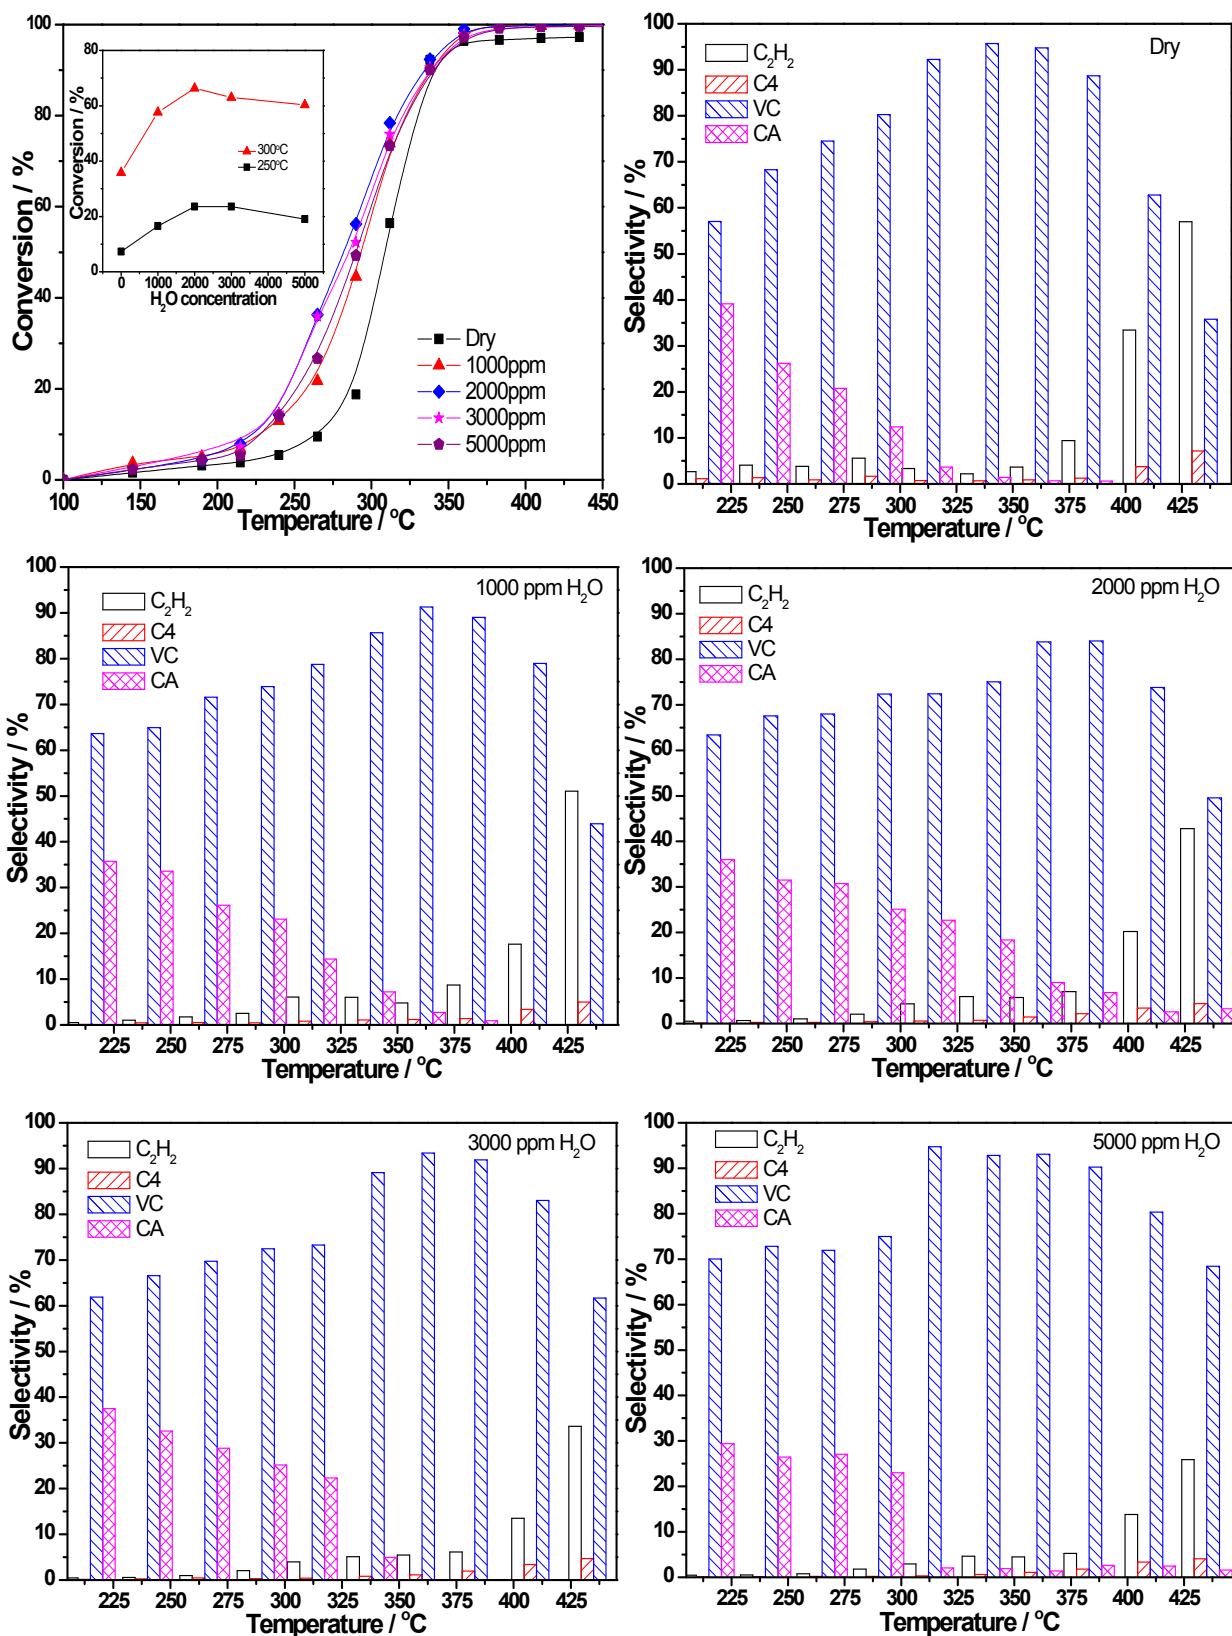

Fig. S4. Water influence on 1,2-DCE dehydrochlorination over  $\text{Al}_2\text{O}_3$  catalysts; reaction gas: 1000 ppm 1,2-DCE and Ar balance;  $\text{SV}=30,000 \text{ mL g}^{-1} \text{ h}^{-1}$ .

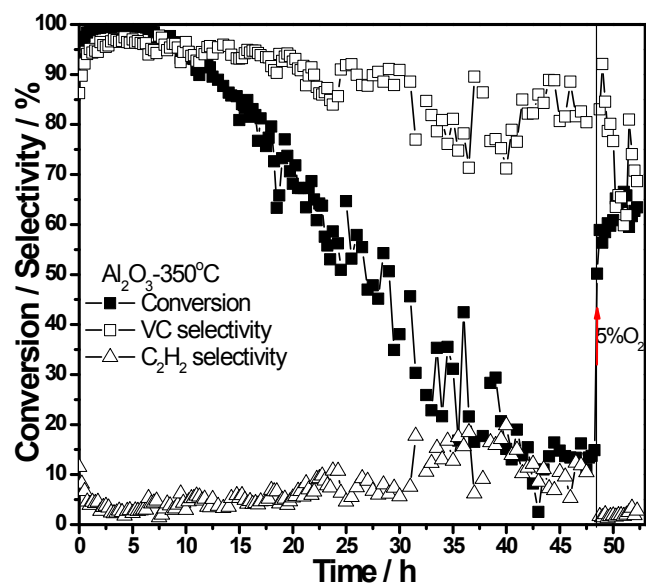

Fig. S5. The stability on feed stream at  $350^\circ\text{C}$  of  $\text{Al}_2\text{O}_3$  catalysts; reaction gas: 1000 ppm 1,2-DCE and Ar balance;  $\text{SV}=30,000 \text{ mL g}^{-1} \text{ h}^{-1}$ .

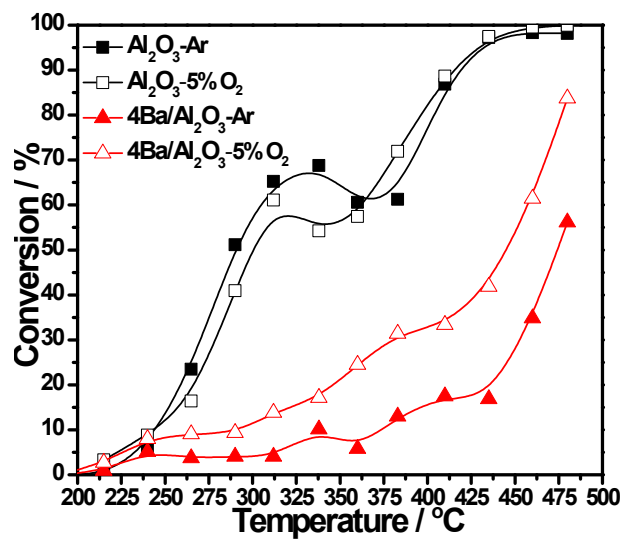

Fig. S6. The conversion curves of VC over  $\text{Al}_2\text{O}_3$  and  $4\text{Ba/Al}_2\text{O}_3$  catalysts ; reaction gas: 1000 ppm VC and Ar balance;  $\text{SV}=30,000 \text{ mL g}^{-1} \text{ h}^{-1}$ .

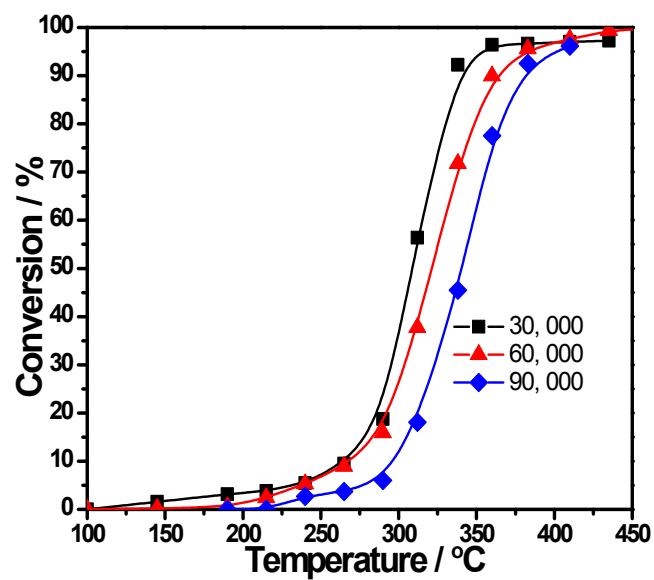

Fig. S7. Conversion curves of 1, 2-DCE over Al<sub>2</sub>O<sub>3</sub> at various space velocities; reaction gas: 1000 ppm 1,2-DCE and Ar balance.



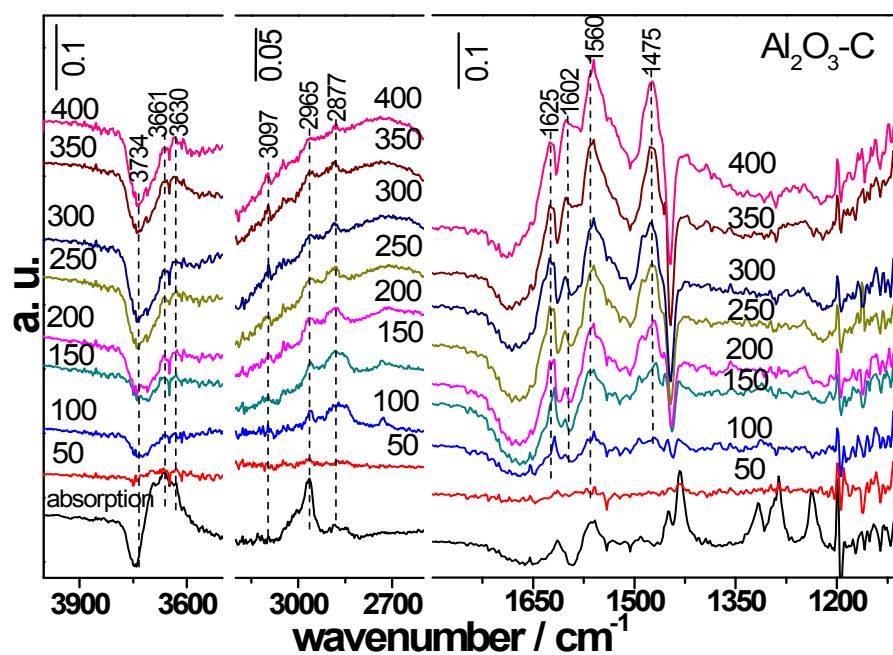

Fig. S8. *In situ* FTIR spectra in 1100-4000  $\text{cm}^{-1}$  region for  $\text{Al}_2\text{O}_3\text{-C}$  in a 1000 ppm 1,2-DCB/Ar stream from 50 to 400 °C after the treatment in Ar at 550 °C.

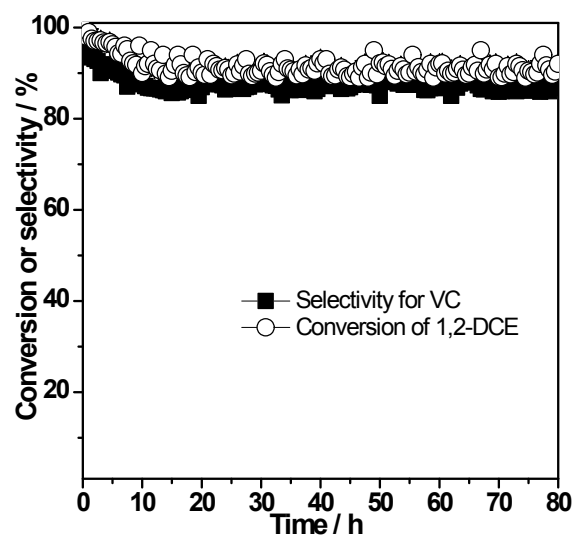

Fig S9. The stability on the feed streams at 400 °C of 4Ba/Al<sub>2</sub>O<sub>3</sub> catalysts; reaction gas: 1000 ppm 1,2-DCE, 5% O<sub>2</sub> and Ar balance; SV=30,000 mL g<sup>-1</sup> h<sup>-1</sup>.
